# Supplementary material
Source: PubMed Central journal article supplement (PMC5222542)
Supplement: NIHMS803974-supplement-6.pdf [file NIHMS803974-supplement-6.pdf]

| Locus Name | Chromosome | Coordinate | Caucasian | African American | Other | NCBI Gene Id | Gene Symbol  | Location |
|------------|------------|------------|-----------|------------------|-------|--------------|--------------|----------|
| rs1018381  | 6          | 15657070   | 0.5       | 0.5              |       | 84062        | DTNBP1       |          |
| rs10239654 | 7          | 83590231   |           | 0.0916667        |       | 10371        | SEMA3A       | EXON     |
| rs1026196  | 7          | 131961029  | 0         | 0                |       | 91584        | PLXNA4       |          |
| rs1044396  | 20         | 61981134   | 0.5       |                  |       | 1137         | CHRNA4       | EXON     |
| rs1045688  | 15         | 48065487   | 0.5       |                  |       | 80031        | SEMA6D       | EXON     |
| rs10519143 | 15         | 48055567   | 0.5       |                  |       | 80031        | SEMA6D       |          |
| rs1064204  | 18         | 42532693   | 0.5       |                  |       | 26040        | SETBP1       | EXON     |
| rs1079727  | 11         | 113289182  |           | 0.0916667        |       | 1813         | DRD2         |          |
| rs10866628 | 5          | 167847658  | 0.5       | 0.5              |       | 23286        | WWC1         |          |
| rs10891551 | 11         | 113332295  |           | 0.0833333        |       | 1813         | DRD2         |          |
| rs11030104 | 11         | 27684517   | 0.5       |                  |       | 627/497258   | BDNF/BDNF-AS |          |
| rs11071511 | 15         | 32344335   | 0         | 0.5              |       | 1139         | CHRNA7       |          |
| rs11100040 | 4          | 157006954  | 0         | 0.5              |       |              |              |          |
| rs11246226 | 11         | 641191     | 0.5       | 0.5              |       |              |              |          |
| rs11246228 | 11         | 641563     |           | 0.5              |       |              |              |          |
| rs11632698 | 15         | 74637867   | 0.5       |                  |       | 1583         | CYP11A1      |          |
| rs1181370  | 7          | 83326168   | 0.5       | 0.5              |       |              |              |          |
| rs11855337 | 15         | 48062074   | 0.5       |                  |       | 80031        | SEMA6D       |          |
| rs12457805 | 18         | 42599237   |           | 0                |       | 26040        | SETBP1       |          |
| rs12607198 | 18         | 42313262   | 0.5       | 0.5              |       | 26040        | SETBP1       |          |
| rs1273108  | 9          | 117866424  | 0.5       | 0                |       | 3371         | TNC          |          |
| rs12842    | 12         | 8072008    | 0         | 0                |       | 6515         | SLC2A3       | EXON     |
| rs12913651 | 15         | 74531418   | 0         |                  |       | 80125        | CCDC33       |          |
| rs13231088 | 7          | 83823248   | 0.0583333 | 0.158333         |       | 10371        | SEMA3A       |          |
| rs1330364  | 9          | 117813974  |           | 0                |       | 3371         | TNC          |          |
| rs13321    | 9          | 117792583  | 0         | 0                |       | 3371         | TNC          | EXON     |
| rs1486008  | 3          | 113888441  | 0.0666667 | 0.141667         |       | 1814         | DRD3         |          |
| rs1582639  | 7          | 132009356  | 0.5       | 0                |       | 91584        | PLXNA4       |          |
| rs165599   | 22         | 19956781   |           | 0.5              |       | 1312         | COMT         | EXON     |
| rs16978224 | 18         | 42486281   | 0.5       |                  |       | 26040        | SETBP1       |          |
| rs16978258 | 18         | 42622845   |           | 0                |       | 26040        | SETBP1       |          |
| rs17219279 | 7          | 132009332  | 0.0840708 |                  |       | 91584        | PLXNA4       |          |
| rs17571    | 11         | 1782594    | 0.0884956 | 0.0221239        |       | 1509/81532   | CTSD/MOB2    | EXON     |
| rs1799990  | 20         | 4680251    | 0.345133  | 0.331858         |       | 5621         | PRNP         | EXON     |

| Locus Name | Chromosome | Coordinate | Caucasian | African American | Other     | NCBI Gene Id    | Gene Symbol       | Location |
|------------|------------|------------|-----------|------------------|-----------|-----------------|-------------------|----------|
| rs1800443  | 11         | 639830     |           | 0.0765766        |           | 1815            | DRD4              | EXON     |
| rs1800497  | 11         | 113270828  | 0.19469   |                  |           | 255239          | ANKK1             | EXON     |
| rs1997794  | 20         | 1974858    |           | 0                |           | 5173            | PDYN              | EXON     |
| rs2061174  | 7          | 136661400  | 0.5       | 0                |           | 1129/349160     | CHRM2/LOC349160   |          |
| rs2075594  | 15         | 74702661   | 0.0619469 | 0.159292         |           | 8482            | SEMA7A            | EXON     |
| rs2168631  | 5          | 174876002  | 0.141667  | 0.308333         |           |                 |                   |          |
| rs2228595  | 7          | 86415987   | 0.5       |                  |           | 2913            | GRM3              | EXON     |
| rs2235749  | 20         | 1959939    |           | 0.5              |           | 5173            | PDYN              | EXON     |
| rs2236196  | 20         | 61977556   | 0.5       | 0.5              |           | 1137            | CHRNA4            | EXON     |
| rs2244822  | 12         | 8088227    | 0.5       | 0.5              |           | 6515            | SLC2A3            |          |
| rs2289188  | 15         | 74742468   | 0.5       |                  |           | 84993           | UBL7              |          |
| rs2292962  | 11         | 1778321    |           | 0                |           | 1509/81532      | CTSD/MOB2         |          |
| rs2337980  | 15         | 32444196   | 0.5       | 0.5              |           | 1139            | CHRNA7            |          |
| rs2372032  | 7          | 83742490   | 0         |                  |           | 10371           | SEMA3A            |          |
| rs2480933  | 9          | 117864609  | 0         | 0                |           | 3371            | TNC               |          |
| rs2587548  | 11         | 113292212  | 0         |                  |           | 1813            | DRD2              |          |
| rs2630349  | 3          | 113873372  | 0.5       | 0                |           | 1814            | DRD3              |          |
| rs2770292  | 13         | 47435106   |           | 0                |           | 3356            | HTR2A             |          |
| rs281913   | 7          | 131797860  |           | 0                |           |                 |                   |          |
| rs324030   | 3          | 113881441  | 0.5       |                  |           | 1814            | DRD3              |          |
| rs362987   | 20         | 10277452   | 0.5       | 0.5              |           | 6616            | SNAP25            |          |
| rs363050   | 20         | 10234257   | 0.5       | 0                |           | 6616            | SNAP25            |          |
| rs3738401  | 1          | 231830295  | 0.5       |                  |           | 27185/100303453 | DISC1/TSNAX-DISC1 | EXON     |
| rs3744825  | 18         | 42532606   |           | 0                |           | 26040           | SETBP1            | EXON     |
| rs3752706  | 7          | 132123678  | 0         | 0.5              |           | 91584           | PLXNA4            |          |
| rs3758653  | 11         | 636399     | 0.5       |                  |           |                 |                   |          |
| rs3789868  | 9          | 117875681  | 0.473451  | 0.115044         |           | 3371            | TNC               |          |
| rs3801601  | 7          | 83633413   |           | 0.185185         |           | 10371           | SEMA3A            |          |
| rs3801630  | 7          | 83734625   | 0         |                  |           | 10371           | SEMA3A            |          |
| rs77579609 | 7          | 83932338   |           |                  | 0.0166667 |                 |                   |          |
| rs4234898  | 4          | 156998541  | 0         | 0                |           |                 |                   |          |
| rs429358   | 19         | 45411941   | 0.5       |                  |           | 348             | APOE              | EXON     |
| rs4532     | 5          | 174870150  | 0.5       | 0                |           | 1812            | DRD1              | EXON     |
| rs4594581  | 3          | 139922531  | 0.5       |                  |           | 64084           | CLSTN2            |          |

| Locus Name | Chromosome | Coordinate | Caucasian | African American | Other | NCBI Gene Id    | Gene Symbol       | Location |
|------------|------------|------------|-----------|------------------|-------|-----------------|-------------------|----------|
| rs4633     | 22         | 19950235   |           | 0.266667         |       | 1312            | COMT              | EXON     |
| rs4680     | 22         | 19951271   |           | 0.5              |       | 1312            | COMT              | EXON     |
| rs5326     | 5          | 174870196  | 0.5       |                  |       | 1812            | DRD1              | EXON     |
| rs57375108 | 18         | 42435163   |           |                  |       | 26040           | SETBP1            |          |
| rs6107516  | 20         | 4677092    | 0.243363  | 0.208333         |       | 5621            | PRNP              |          |
| rs618472   | 18         | 42462563   | 0         | 0.5              |       | 26040           | SETBP1            |          |
| rs6265     | 11         | 27679916   | 0.5       |                  |       | 627/497258      | BDNF/BDNF-AS      | EXON     |
| rs6269     | 22         | 19949952   | 0         | 0.5              |       | 1312            | COMT              |          |
| rs6277     | 11         | 113283459  | 0         |                  |       | 1813            | DRD2              | EXON     |
| rs6280     | 3          | 113890815  | 0.341667  | 0.116667         |       | 1814            | DRD3              | EXON     |
| rs6314     | 13         | 47409034   | 0.0619469 | 0.158333         |       | 3356            | HTR2A             | EXON     |
| rs6439886  | 3          | 139682495  |           | 0.163717         |       | 64084           | CLSTN2            |          |
| rs6465084  | 7          | 86403475   | 0.5       | 0                |       | 2913            | GRM3              |          |
| rs665119   | 18         | 42447532   | 0         | 0.5              |       | 26040           | SETBP1            |          |
| rs688709   | 15         | 48083383   | 0.340708  | 0.00442478       |       |                 |                   |          |
| rs7029844  | 9          | 117878911  | 0         | 0                |       | 3371            | TNC               |          |
| rs7234846  | 18         | 42403140   | 0.5       | 0.5              |       | 26040           | SETBP1            |          |
| rs7412     | 19         | 45412079   | 0.5       |                  |       | 348             | APOE              | EXON     |
| rs741761   | 15         | 74703929   | 0.5       | 0                |       | 8482            | SEMA7A            | EXON     |
| rs760761   | 6          | 15651132   | 0.5       | 0.5              |       | 84062           | DTNBP1            |          |
| rs76739    | 15         | 48042146   |           | 0.00442478       |       | 80031           | SEMA6D            |          |
| rs7718568  | 5          | 167861057  | 0         | 0.5              |       | 23286           | WWC1              |          |
| rs7795229  | 7          | 83519060   |           | 0.5              |       |                 |                   |          |
| rs7851618  | 9          | 117823010  |           | 0                |       | 3371            | TNC               |          |
| rs8090594  | 18         | 42514448   | 0.5       | 0                |       | 26040           | SETBP1            |          |
| rs8191992  | 7          | 136701308  | 0.5       | 0                |       | 1129/349160     | CHRM2/LOC349160   | EXON     |
| rs821616   | 1          | 232144598  |           | 0.5              |       | 27185/100303453 | DISC1/TSNAX-DISC1 | EXON     |
| rs933552   | 12         | 8090703    | 0.5       | 0.5              |       |                 |                   |          |
